# Supplementary material
Source: PubMed Central journal article supplement (PMC6643554)
Supplement: ao8b02978_si_001.pdf [file ao8b02978_si_001.pdf]

## Supporting Information

### Uniform vapor pressure based CVD growth of MoS<sub>2</sub> using MoO<sub>3</sub> thin film as a precursor for co-evaporation

*Sajeevi S. Withanage,<sup>†,‡</sup> Hirokjyoti Kalita,<sup>‡,||</sup> Hee-Suk Chung,<sup>⊥</sup> Tania Roy,<sup>‡,§,||</sup> Yeonwoong Jung,<sup>‡,§,||</sup> Saiful I. Khondaker<sup>\*,†,‡,||</sup>*

<sup>†</sup> University of Central Florida, Department of Physics, 4111 Libra Drive, Physical Sciences Bldg. 430, Orlando, FL 32816, United States

<sup>‡</sup> University of Central Florida, NanoScience Technology Center, 12424 Research Pkwy #400, Orlando, FL, United States

<sup>§</sup> University of Central Florida, Department of Materials Science & Engineering, 12760 Pegasus Drive, Engineering I, Suite 207, Orlando, FL, 32816, United States

<sup>||</sup> University of Central Florida, Department of Electrical & Computer Engineering, 4328 Scorpius Street, Orlando, FL 32816, United States

<sup>⊥</sup> Korea Basic Science Institute, Analytical Research Division, Geonji-road 20, Jeonju, 54907, South Korea

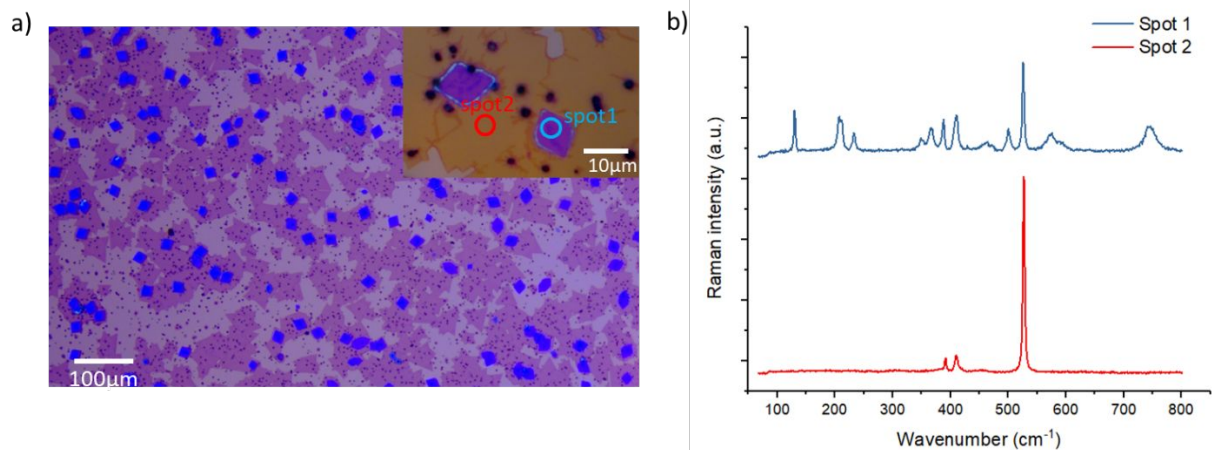

**Figure S1.** Growth results for co-evaporation of  $\text{MoO}_3$  and sulfur powders. a) Optical micrographs for the crystals grown with  $\sim 1\text{mg}$  of  $\text{MoO}_3$  powder and  $600\text{mg}$  of S with the same setup. b) The Raman single spectra taken at spot 1 (blue) and spot 2 (red) shown in the inset of a). The Raman spectra is a combination at spot 1 is  $\text{MoS}_2/\text{MoOS}_2$ <sup>1</sup> and the reduced intensity of Si peak is an indication that these plates are very thick. Also, the high intensity of  $\text{MoS}_2$  peaks implies that a thick layer of  $\text{MoS}_2$  is grown on top of the oxysulfide plates. The spot 2 shows a  $\Delta=18.92\text{ cm}^{-1}$  between  $E_{2g}^1$  and  $A_{1g}$  peaks which corresponds to monolayer  $\text{MoS}_2$ .

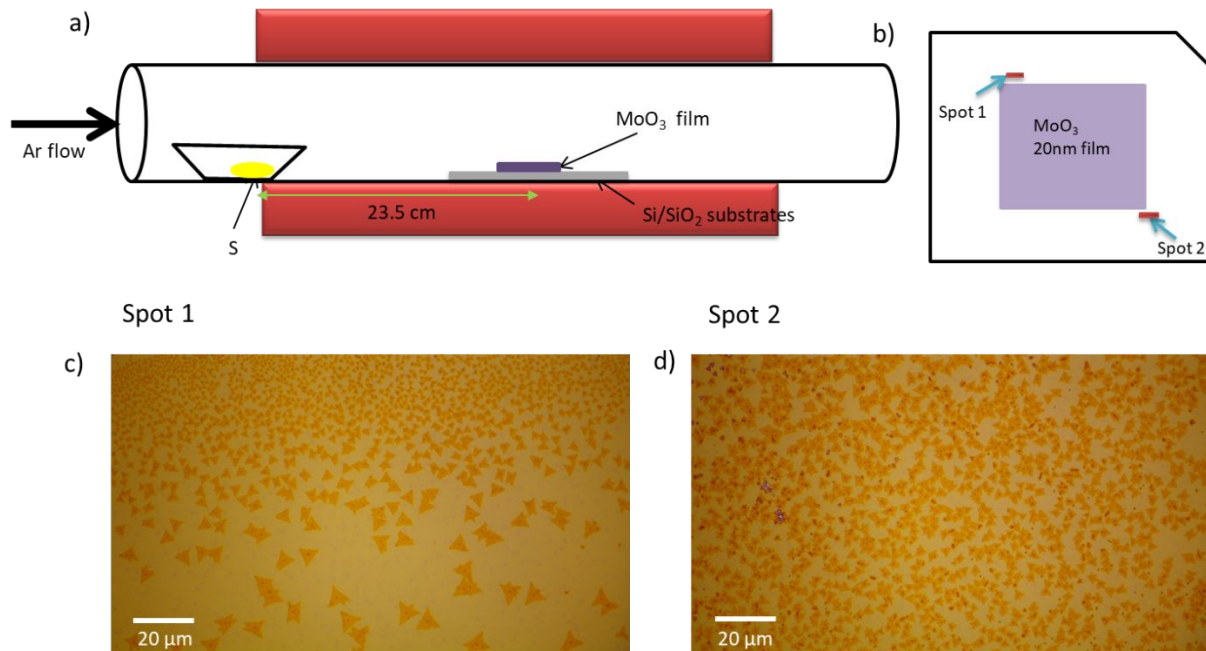

**Figure S2.** Lateral placement of source and substrate. a) Experimental setup showing relative positioning of substrate and precursors. b) Locations of MoS<sub>2</sub> growth on the substrate. c), d) Optical micrographs at spots 1 and 2 respectively. Using the same MoO<sub>3</sub> film thickness (20 nm) and same amount of S (600 mg), we observed that MoS<sub>2</sub> growth is limited to few spots near the source edges in lateral placement geometry.

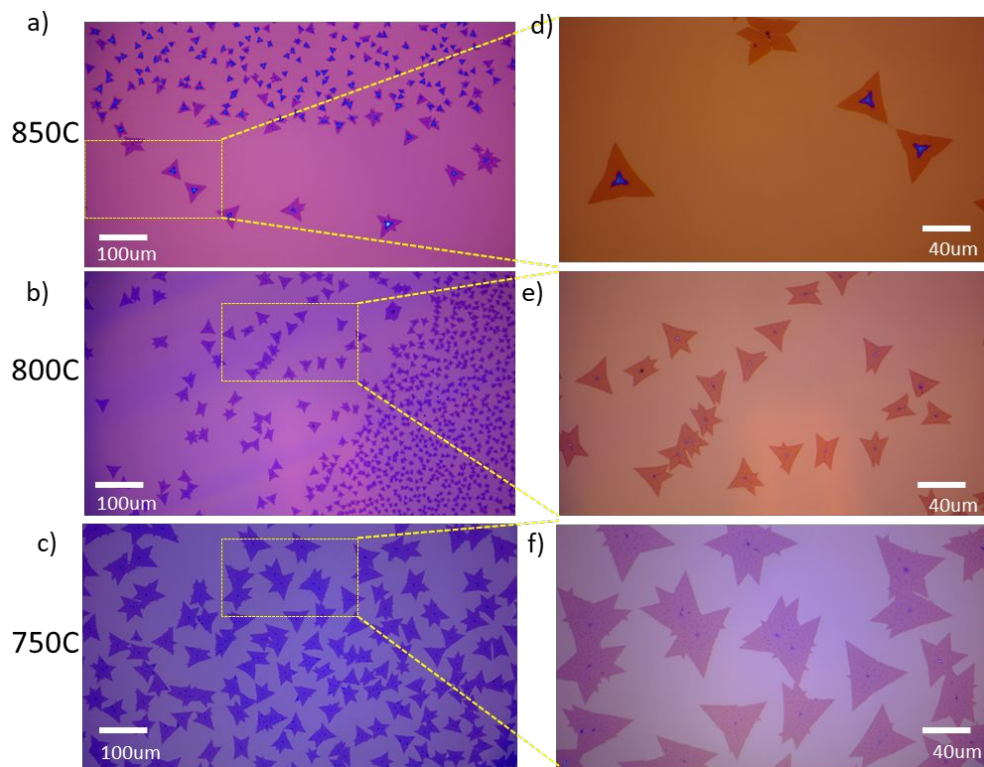

**Figure S3.** Growth at different temperatures. a)-c) Optical images of growth at 850C, 800C and 750C respectively taken at 20X magnification. d)- f) corresponding images at 50x magnification.

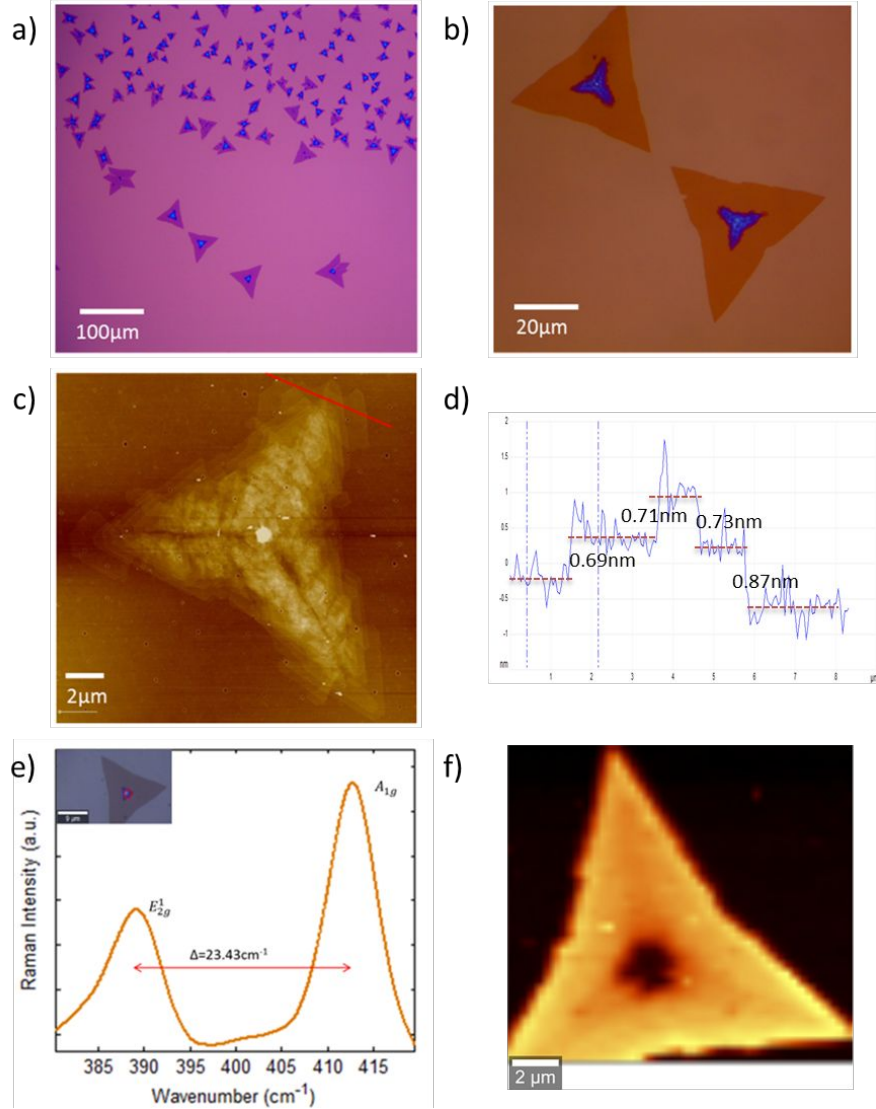

**Figure S4.** Multilayer growth around the nucleation center at 850°C. a), b) Optical images taken at 20x and 100x magnifications respectively. c) AFM topography and d) height profile showing step-like height variation which corresponds to individual MoS<sub>2</sub> layers. e) Raman spectra for the multilayers at the nucleation center. f) PL mapping centered at 1.8eV shows the PL intensity drop at the center due to the thick layers and uniform outer region consists of monolayer MoS<sub>2</sub>

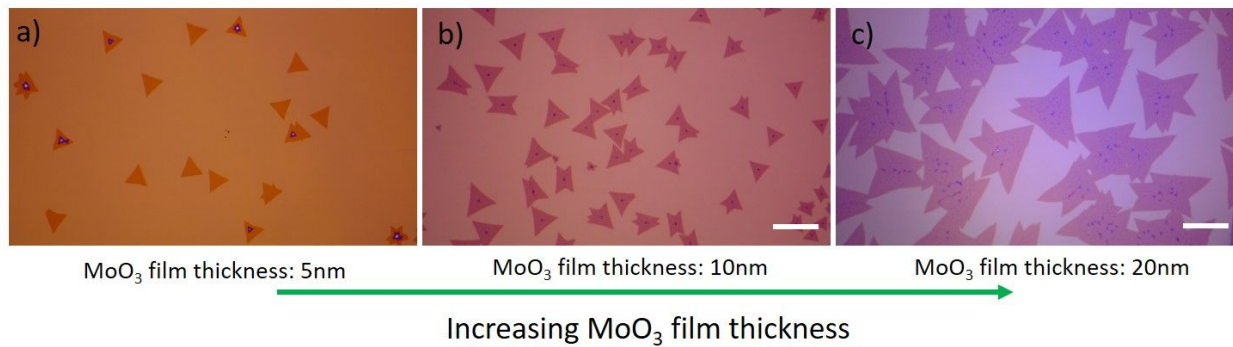

**Figure S5.** Effect of MoO<sub>3</sub> film thickness. Optical micrographs of crystals grown with a) 5nm, b) 10nm, c) 20nm MoO<sub>3</sub> precursor thickness with 600mg of sulfur. Scale bar is 40 $\mu$ m in each image.

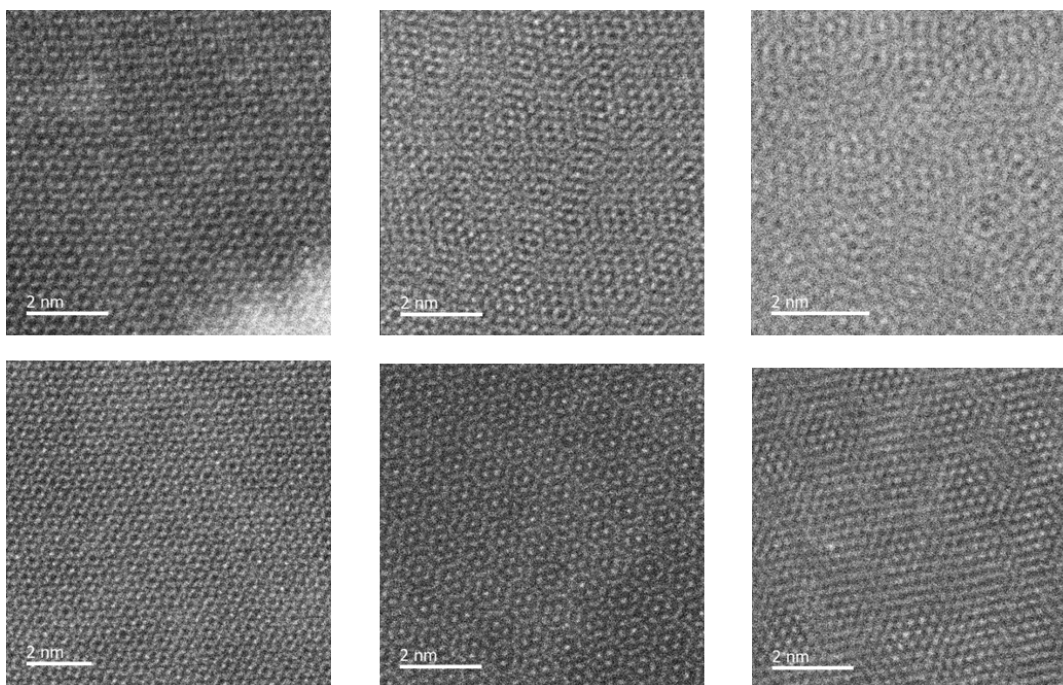

**Figure S6.** Supplementary TEM images. Different Moiré patterns were seen at some locations of the transferred flakes depending on the angle of orientation of different layers at the polycrystalline regions and/or different folding orientations of the transferred films.

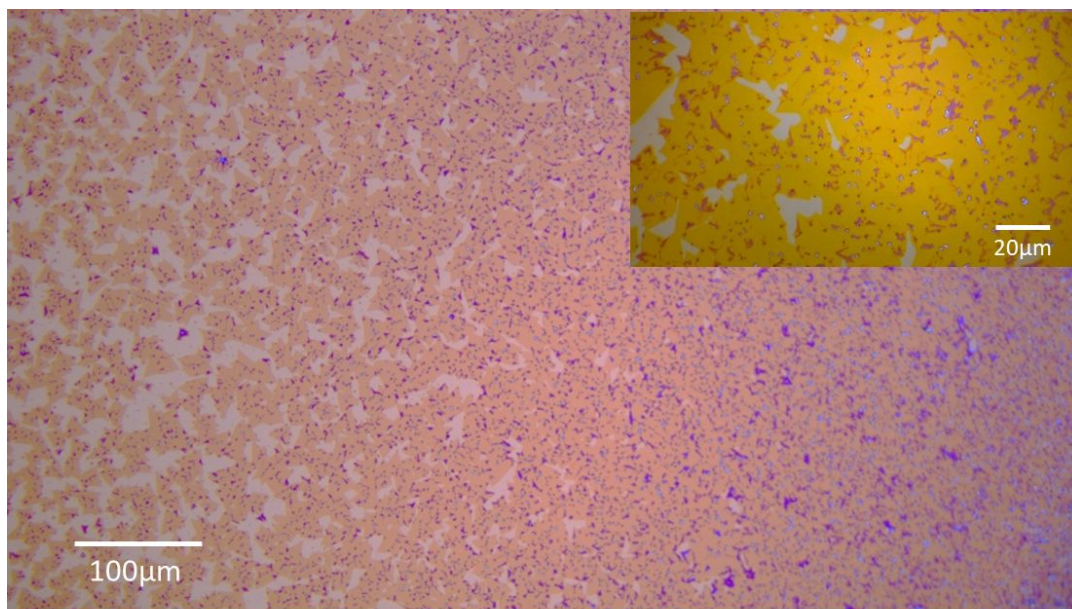

**Figure S7.** MoS<sub>2</sub> growth on source substrate. An optical micrograph of the 20nm MoO<sub>3</sub> source substrate after the growth. An enlarged image is shown (100X) in the inset. We observed this growth at few regions of the source substrate and most of these regions are polycrystalline. Grain boundaries and overlapping is also visible in the optical images.



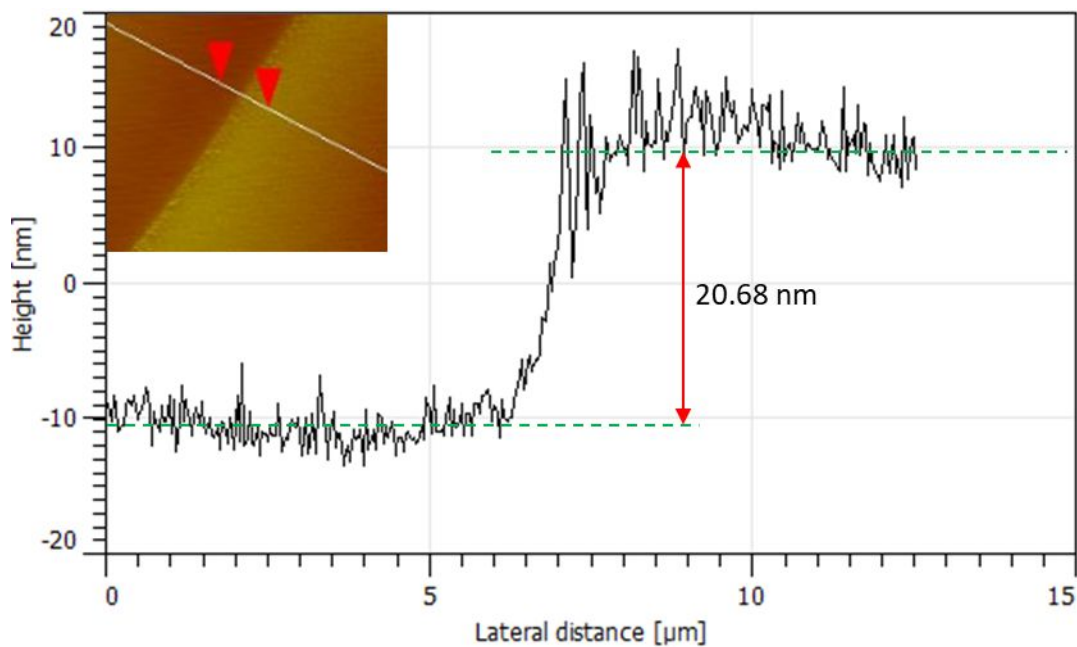

**Figure S8.** AFM characterization of thermally deposited thin film with target thickness of 20nm. AFM topography image shown in the inset express high uniformity of the deposited thin film. Height profile shows a clear step height of 20.68 nm at the substrate-thin film boundary

## References

- (1) Pondick, J. V.; Woods, J. M.; Xing, J.; Zhou, Y.; Cha, J. J. Stepwise Sulfurization from MoO<sub>3</sub> to MoS<sub>2</sub> via Chemical Vapor Deposition. *ACS Applied Nano Materials* **2018**, *1* (10), 5655-5661.
